# Supplementary material for: Cell diversity and network dynamics in photosensitive human brain organoids
Source: Springer Nature journal article supplement (doi:10.1038/nature22047), 2017-04-25
Supplement: 41586_2017_BFnature22047_MOESM1_ESM.pdf [file 41586_2017_BFnature22047_MOESM1_ESM.pdf]

## Supplementary discussion

### Overall developmental timeline and brain regionalization in human whole-brain organoids

We first defined the timeline of generation of broadly-defined cell classes in organoids by using immunohistochemistry (IHC) for a small number of informative single-gene markers on organoids derived from the iPSC11a line. We examined markers of neural progenitors (e.g. PAX6), neurons (e.g. MAP2, GABA, TH), and glial cells (e.g. GFAP, OLIG2) over a time course of organoid development spanning 1, 3, 6, and 9 months (Extended Data Figure 1b). PAX6<sup>+</sup> neural progenitors emerged first, followed by increased expression of the pan-neuronal marker MAP2 (100% of organoids, n=12 from 2 bioreactors), and markers for glutamatergic (VGLUT1), GABAergic (GABA), and dopaminergic (TH) neuronal identities (Extended Data Figure 1b; VGLUT1 100%; GABA 100%; TH 100% of organoids, n=9-13 each, from 2 bioreactors). Matching the endogenous developmental sequence, GFAP<sup>+</sup> astroglia became apparent only at 3 mo, following the main wave of neurogenesis (Extended Data Figure 1b; 100% of organoids, n=14 from 2 bioreactors). We also examined the neural progenitor markers NKX2.1, GBX2, OTX2, EMX1, FOXG1, and VSX2 at 1 mo. Similarly to the endogenous developing brain, 1 mo organoids exhibited early brain regionalization, as shown by the expression of markers for germinal zones of the forebrain (PAX6 and NKX2.1, 100% and 55% of organoids, respectively; n=20, 3 bioreactors), midbrain/retina (OTX2, 100% of organoids, n=16, 3 bioreactors), and hindbrain (GBX2, 100% of organoids, n=20, 3 bioreactors) (Extended Data Figure 1c). Besides the dorsal forebrain, PAX6 is also expressed in the developing retina. Given the overlap in gene expression between developing retina and forebrain, we looked specifically at the development of these two structures by immunostaining with VSX2 (a marker of the retinal field), FOXG1 (a marker of the forebrain) and EMX1 (a marker of the dorsal forebrain) at both 1 mo and 6 mo. As seen *in vivo*, the expression

of these markers was mutually exclusive, with the retinal field present in all organoids analysed (100% of organoids were *VSX2*<sup>+</sup>, n=35, 6 bioreactors), and the forebrain present in a subset of organoids (37% of organoids contained both *EMX1*<sup>+</sup> and *FOXG1*<sup>+</sup> cells, n=35, 6 bioreactors; no organoid contained only one or the other) (Extended Data Figure 1d).

### **Quantification of variability in production of cell clusters and subclusters across organoids**

In order to quantify variability among organoids and possible bioreactor-based batch effects, we determined the frequency with which cells from each of the ten main clusters were generated in individual organoids, across cultures from different bioreactors (Figure 1c). We found that 89% of organoids contained cluster c1; 95% cluster c2; 53% cluster c3; 32% cluster c4; 89% cluster c5; 89% cluster c9, and 89% cluster c10 (Extended Data Figure 3). Organoids grown in the same bioreactor were more similar to each other in their ability to make cells of each cluster. This was striking when comparing bioreactor 4, where most of the organoids were less differentiated and contained large numbers of progenitors, to bioreactors 1, 2 and 3, where the vast majority of organoids contained much higher percentages of differentiated cells (e.g., cells in clusters c2, c4 and c5). Similarly, 100% of organoids from bioreactor 3 contained the forebrain cluster (c4), while this cluster was less represented in organoids grown in the other bioreactors sampled. To extend this observation, we used immunohistochemical analysis to examine organoids generated in a separate bioreactor (bioreactor 5), and found that 6 out of 6 organoids expressed multiple markers for progenitors of the forebrain (e.g. *FOXG1*, *NES*, *SOX2*), and for excitatory projection neurons of the cortex (e.g. *FOXG1/CTIP2* and *FOXG1/SATB2*) (Extended Data Figure 5a). This indicates that certain flasks have a markedly greater ability to consistently generate forebrain cell identities, suggesting that the specific environment where organoids are grown is a key factor in controlling cell class identity.

To increase resolution and assess the distribution across organoids of distinct cell types from the forebrain cluster, we examined the forebrain sub-clusters in organoids from bioreactor 3, in which all organoids generated forebrain cells, in more detail. We found that among organoids from this bioreactor, cortical interneurons and corticofugal projection neurons were present in 50% of the organoids, while callosal projection neurons were present in all organoids sampled. Among forebrain progenitors, radial glia cells were very abundant and present in all organoids, while only 50% of organoids contained intermediate progenitor cells (Extended Data Figure 5b). This is likely an overestimation of the true variability, given the relatively small number of cells in each sub-cluster sampled from individual organoids, and the likelihood that different cell types will vary in robustness to dissociation and collection. This conclusion is supported by the observation that IHC for known marker genes indicates a much higher frequency of co-development of the same putative populations of forebrain cells (Extended Data Figure 5a).

In order to determine the reproducibility with which the retina cluster was generated in different organoids, we examined organoids from bioreactors 1, 2 and 3, where all organoids generated retinal cells (Figure 2d). Of the neuronal subtypes, photoreceptors were present in 73% of the organoids, while the other neuronal subtypes (retinal ganglion cells, bipolar cells and amacrine cells) were each present in approximately 55% of the organoids. Muller glia were found in 36% of the organoids. Pigmented epithelial cells, on the other hand, were found in most of the organoids (91%). Again, this is likely an underestimation of the prevalence of these cell types, given that by IHC, markers for the same putative populations of retinal cells were detected in every organoid examined (Extended Data Figure 5c).

## Synapse density in comparison to human fetal brain

We performed serial EM reconstruction of a region about 70  $\mu\text{m}$  below the surface of an 8 mo organoid, and identified a total of 129 synapses in this volume (0.088 synapses per  $\mu\text{m}^3$ ). In the developing human brain, the number of synapses per volume depends strongly on age and brain region (see for example <sup>31</sup>). Our measure of 0.088 synapses per cubic micron is in the same range as the values reported for human fetal cortex (approximately 0.03 - 0.12 synapses per cubic micron at 200 days of gestation, depending on region<sup>31</sup>).

## Reproducibility of the electrophysiology data

We validated electrophysiological profile in a second organoid line generated from the hES cell line HuES66 (Extended Data Figure 7c,d).

**Supplementary Table 1 Primary antibodies employed in this study.**

| <b>Antibody</b> | <b>Host animal</b> | <b>Company</b> | <b>Catalog number</b> | <b>Dilution</b> |
|-----------------|--------------------|----------------|-----------------------|-----------------|
| AP2 $\alpha$    | Mouse              | U of Iowa      | 3B5                   | 1:100           |
| CTIP2           | Rat                | Abcam          | AB18465               | 1:100           |
| CUX1            | Mouse              | Abcam          | AB54583               | 1:350           |
| DCX             | Goat               | Santa Cruz     | SC8066                | 1:300           |
| EMX1            | Rabbit             | Sigma          | HPA006421             | 1:50            |
| FOXP1           | Rabbit             | Abcam          | AB18259               | 1:300           |
| GFAP            | Mouse              | Sigma          | G3893                 | 1:400           |
| GABA            | Rabbit             | Sigma          | A2052                 | 1:1000          |
| GS              | Rabbit             | Abcam          | AB73593               | 1:200           |
| HIF1 $\alpha$   | Mouse              | Abcam          | AB16066               | 1:200           |
| ISL1            | Rabbit             | Abcam          | AB109517              | 1:2000          |
| MAP2            | Chicken            | Abcam          | AB5392                | 1:5000          |
| MITF            | Mouse              | Exalpa         | X2398M                | 1:500           |
| Nestin          | Mouse              | Abcam          | AB6142                | 1:100           |
| NKX2.1          | Rabbit             | DSBS           | 74.5A5                | 1:250           |
| OTX2            | Rabbit             | Abcam          | AB21990               | 1:100           |
| PAX6            | Rabbit             | Biologend      | 901301                | 1:400           |
| SYN1            | Mouse              | SYSY           | 106 001               | 1:100           |
| TH              | Rabbit             | Millipore      | AB152                 | 1:5000          |
| TUJ1            | Rabbit             | Sigma          | T2200                 | 1:1000          |
| GBX2            | Goat               | Abcam          | AB109726              | 1:200           |
| OLIG2           | Rabbit             | IBL            | 18953                 | 1:200           |
| VGLUT1          | Rabbit             | SYSY           | 135302                | 1:1000          |
| HOMER1          | Rabbit             | SYSY           | 160003                | 1:700           |
| c-FOS           | Rabbit             | Abcam          | AB134122              | 1:500           |
| RHODOPSIN       | Mouse              | Abcam          | AB5417                | 1:800           |
| VSX2            | Sheep              | Millipore      | AB9016                | 1:300           |
